# Supplementary material for: miR-375 suppresses the growth and metastasis of esophageal squamous cell carcinoma by targeting PRDX1
Source: PubMed Central journal article supplement — J Gastrointest Oncol. 2022 Oct;13(5):2154–68. doi: 10.21037/jgo-22-929 (PMC9660039; doi:10.21037/jgo-22-929), 2022-10
Supplement: jgo-13-05-2154-dss.pdf [file jgo-13-05-2154-dss.pdf]

## Data Sharing Statement

|                     |                                                                                                                                                     |                                                                                                                                     |
|---------------------|-----------------------------------------------------------------------------------------------------------------------------------------------------|-------------------------------------------------------------------------------------------------------------------------------------|
| <b>Article Info</b> | <a href="https://dx.doi.org/10.21037/jgo-22-929">https://dx.doi.org/10.21037/jgo-22-929</a>                                                         |                                                                                                                                     |
| <b>Item</b>         | <b>Question</b>                                                                                                                                     | <b>Authors' Response<br/>(place "-" if not applicable)</b>                                                                          |
| 1                   | Would you like to share data collected for your study to others?                                                                                    | Yes.                                                                                                                                |
| 2                   | If not, would you like to share the reason for your decision?                                                                                       | -                                                                                                                                   |
| 3                   | What data in particular will be shared?                                                                                                             | Raw measurements and photographs.                                                                                                   |
| 4                   | Any other documents will be shared? Such as study protocol, statistical analysis plan, informed consent form, clinical study report, analytic code. | Yes.<br>Study protocol, statistical analysis plan, informed consent form.                                                           |
| 5                   | When will data availability begin?                                                                                                                  | From the publication date.                                                                                                          |
| 6                   | When will data availability end?                                                                                                                    | Two years within the publication date, since the technique or survival data may be updated over time.                               |
| 7                   | To whom will you share the data?                                                                                                                    | Medical oncologists and surgeons who are interested in studies of ESCC                                                              |
| 8                   | For what type of analysis or purpose?                                                                                                               | Further investigation of miRNA as a potential therapeutic approach in esophageal cancer                                             |
| 9                   | How or where can the data/documents be obtained?                                                                                                    | Emails could be sent to the address below to obtain the shared data: <a href="mailto:20111177@wnmc.edu.cn">20111177@wnmc.edu.cn</a> |
| 10                  | Any other restrictions?                                                                                                                             | We may balance the potential benefits and risks for each request and then provide the data that could be shared.                    |
